# Supplementary material for: Tear nanoDSF Denaturation Profile Is Predictive of Glaucoma
Source: MDPI journal article supplement (doi:10.3390/ijms24087132), 2023-04-12
Supplement: s1 [file s1]

**Table S1.** Distribution of patients in clusters determined with k-means two-parameter clustering based on TFDP maxima ( $T_m^1$  and  $T_m^2$ ).

**Cluster 1**

| POAG   |                         |                         | PRD    |                         |                         | control |                         |                         |
|--------|-------------------------|-------------------------|--------|-------------------------|-------------------------|---------|-------------------------|-------------------------|
| number | $T_m^1, ^\circ\text{C}$ | $T_m^2, ^\circ\text{C}$ | number | $T_m^1, ^\circ\text{C}$ | $T_m^2, ^\circ\text{C}$ | number  | $T_m^1, ^\circ\text{C}$ | $T_m^2, ^\circ\text{C}$ |
| G1     | 63.15                   | 75.45                   | P1     | 66.55                   | 77.55                   | C1      | 67.95                   | 77.95                   |
| G2     | 68.55                   | 79.85                   | P2     | 66.85                   | 79.05                   | C2      | 70.55                   | 79.15                   |
| G3     | 67.35                   | 78.75                   | P3     | 67.65                   | 79.45                   | C3      | 68.25                   | 78.55                   |
| G4     | 68.05                   | 80.05                   | P4     | 69.75                   | 78.65                   | C4      | 68.25                   | 78.55                   |
| G5     | 67.65                   | 77.95                   | P5     | 69.05                   | 78.35                   | C5      | 67.45                   | 78.55                   |
| G6     | 67.45                   | 78.45                   | P6     | 69.35                   | 78.35                   | C6      | 67.15                   | 76.95                   |
| G7     | 69.45                   | 81.25                   | P7     | 66.55                   | 77.55                   | C7      | 68.05                   | 78.45                   |
| G8     | 66.15                   | 76.65                   | P8     | 67.85                   | 77.45                   | C8      | 69.05                   | 78.55                   |
| G9     | 69.95                   | 77.85                   | P9     | 70.05                   | 77.55                   | C9      | 66.75                   | 78.05                   |
| G10    | 66.75                   | 78.45                   | P10    | 65.95                   | 76.35                   | C10     | 68.05                   | 76.55                   |
| G11    | 68.85                   | 78.35                   | P11    | 68.55                   | 76.55                   | C11     | 68.85                   | 76.75                   |
| G12    | 69.25                   | 79.35                   | P12    | 68.35                   | 77.35                   | C12     | 67.55                   | 78.75                   |
| G13    | 68.75                   | 78.05                   | P13    | 67.45                   | 75.25                   | C13     | 67.75                   | 77.35                   |
| G14    | 68.25                   | 76.95                   | P14    | 66.45                   | 77.75                   | C14     | 67.15                   | 77.35                   |
| G15    | 68.05                   | 76.65                   | P15    | 67.65                   | 78.35                   | C15     | 66.25                   | 77.45                   |
| G16    | 70.75                   | 79.95                   | P16    | 71.55                   | 75.45                   | C16     | 66.25                   | 75.25                   |
| G17    | 68.25                   | 79.15                   | P17    | 69.55                   | 75.35                   | C17     | 71.35                   | 79.05                   |
| G18    | 68.75                   | 79.55                   | P18    | 68.75                   | 75.45                   | C18     | 66.35                   | 75.55                   |
| G19    | 67.15                   | 77.45                   | P19    | 67.25                   | 77.75                   | C19     | 68.95                   | 73.65                   |
| G20    | 70.85                   | 79.55                   | P20    | 70.15                   | 75.65                   | C20     | 68.95                   | 77.95                   |
| G21    | 70.45                   | 79.55                   | P21    | 67.85                   | 78.45                   | C21     | 65.95                   | 77.95                   |
| G22    | 65.85                   | 77.55                   | P22    | 67.35                   | 76.95                   | C22     | 67.05                   | 78.65                   |
| G23    | 69.05                   | 77.35                   | P23    | 66.05                   | 76.85                   | C23     | 67.25                   | 78.45                   |
|        |                         |                         | P24    | 67.55                   | 75.65                   | C24     | 68.45                   | 78.55                   |
|        |                         |                         | P25    | 67.05                   | 78.35                   | C25     | 66.75                   | 78.75                   |
|        |                         |                         | P26    | 68.65                   | 76.95                   | C26     | 68.35                   | 74.95                   |
|        |                         |                         |        |                         |                         | C27     | 66.45                   | 78.55                   |
|        |                         |                         |        |                         |                         | C28     | 66.75                   | 76.85                   |
|        |                         |                         |        |                         |                         | C29     | 68.35                   | 76.85                   |
|        |                         |                         |        |                         |                         | C30     | 68.35                   | 76.05                   |
|        |                         |                         |        |                         |                         | C31     | 67.65                   | 79.55                   |
|        |                         |                         |        |                         |                         | C32     | 68.95                   | 78.15                   |
|        |                         |                         |        |                         |                         | C33     | 68.75                   | 77.95                   |
|        |                         |                         |        |                         |                         | C34     | 66.65                   | 78.35                   |
|        |                         |                         |        |                         |                         | C35     | 67.35                   | 77.15                   |
|        |                         |                         |        |                         |                         | C36     | 68.15                   | 77.75                   |
|        |                         |                         |        |                         |                         | C37     | 68.05                   | 78.05                   |
|        |                         |                         |        |                         |                         | C38     | 67.25                   | 78.25                   |
|        |                         |                         |        |                         |                         | C39     | 69.15                   | 78.95                   |
|        |                         |                         |        |                         |                         | C40     | 69.15                   | 78.95                   |
|        |                         |                         |        |                         |                         | C41     | 67.45                   | 78.55                   |
|        |                         |                         |        |                         |                         | C42     | 68.15                   | 79.25                   |
|        |                         |                         |        |                         |                         | C43     | 68.65                   | 76.95                   |
|        |                         |                         |        |                         |                         | C44     | 69.25                   | 76.85                   |
|        |                         |                         |        |                         |                         | C45     | 65.75                   | 76.65                   |

|  |  |  |  |  |  |     |       |       |
|--|--|--|--|--|--|-----|-------|-------|
|  |  |  |  |  |  | C46 | 65.95 | 76.95 |
|  |  |  |  |  |  | C47 | 69.85 | 77.95 |
|  |  |  |  |  |  | C48 | 68.45 | 77.45 |
|  |  |  |  |  |  | C49 | 69.35 | 78.65 |
|  |  |  |  |  |  | C50 | 68.15 | 78.55 |
|  |  |  |  |  |  | C51 | 69.65 | 79.35 |
|  |  |  |  |  |  | C52 | 69.35 | 79.05 |
|  |  |  |  |  |  | C53 | 69.05 | 79.05 |
|  |  |  |  |  |  | C54 | 67.05 | 78.35 |
|  |  |  |  |  |  | C55 | 67.65 | 75.35 |
|  |  |  |  |  |  | C56 | 63.75 | 76.45 |
|  |  |  |  |  |  | C57 | 65.45 | 77.85 |
|  |  |  |  |  |  | C58 | 66.85 | 78.55 |
|  |  |  |  |  |  | C59 | 68.35 | 76.85 |
|  |  |  |  |  |  | C60 | 68.45 | 76.85 |
|  |  |  |  |  |  | C61 | 70.55 | 77.45 |
|  |  |  |  |  |  | C62 | 61.15 | 71.95 |
|  |  |  |  |  |  | C63 | 65.85 | 76.25 |
|  |  |  |  |  |  | C64 | 67.05 | 76.65 |
|  |  |  |  |  |  | C65 | 68.75 | 78.05 |
|  |  |  |  |  |  | C66 | 67.95 | 77.45 |
|  |  |  |  |  |  | C67 | 68.55 | 77.55 |
|  |  |  |  |  |  | C68 | 69.65 | 78.05 |
|  |  |  |  |  |  | C69 | 67.55 | 76.95 |
|  |  |  |  |  |  | C70 | 67.65 | 77.45 |
|  |  |  |  |  |  | C71 | 67.55 | 78.55 |
|  |  |  |  |  |  | C72 | 68.35 | 77.75 |
|  |  |  |  |  |  | C73 | 67.95 | 78.55 |
|  |  |  |  |  |  | C74 | 67.75 | 78.45 |
|  |  |  |  |  |  | C75 | 66.55 | 78.25 |
|  |  |  |  |  |  | C76 | 68.15 | 77.45 |
|  |  |  |  |  |  | C77 | 67.95 | 78.95 |
|  |  |  |  |  |  | C78 | 67.15 | 77.15 |
|  |  |  |  |  |  | C79 | 68.55 | 77.35 |
|  |  |  |  |  |  | C80 | 67.75 | 77.35 |
|  |  |  |  |  |  | C81 | 66.95 | 76.65 |
|  |  |  |  |  |  | C82 | 67.35 | 77.35 |
|  |  |  |  |  |  | C83 | 67.25 | 78.35 |
|  |  |  |  |  |  | C84 | 69.45 | 79.55 |
|  |  |  |  |  |  | C85 | 67.25 | 77.65 |
|  |  |  |  |  |  | C86 | 67.55 | 77.75 |
|  |  |  |  |  |  | C87 | 68.75 | 77.45 |
|  |  |  |  |  |  | C88 | 67.65 | 78.05 |
|  |  |  |  |  |  | C89 | 68.05 | 78.65 |
|  |  |  |  |  |  | C90 | 67.05 | 77.35 |
|  |  |  |  |  |  | C91 | 68.85 | 77.75 |

## Cluster 2

| POAG   |                                  |                                  | PRD    |                                  |                                  | control |                                  |                                  |
|--------|----------------------------------|----------------------------------|--------|----------------------------------|----------------------------------|---------|----------------------------------|----------------------------------|
| number | T <sub>m</sub> <sup>1</sup> , °C | T <sub>m</sub> <sup>2</sup> , °C | number | T <sub>m</sub> <sup>1</sup> , °C | T <sub>m</sub> <sup>2</sup> , °C | number  | T <sub>m</sub> <sup>1</sup> , °C | T <sub>m</sub> <sup>2</sup> , °C |
| G24    | 63.15                            | 80.45                            | P27    | 67.35                            | 80.85                            | C92     | 63.55                            | 79.75                            |
| G25    | 64.1                             | 81.3                             | P28    | 67.35                            | 80.05                            | C93     | 67.95                            | 81.55                            |
| G26    | 64.05                            | 79.05                            | P29    | 63.65                            | 78.75                            | C94     | 63.55                            | 79.75                            |
| G27    | 63.75                            | 81.75                            | P30    | 65.45                            | 79.15                            | C95     | 66.95                            | 80.45                            |
| G28    | 64.25                            | 77.95                            | P31    | 67.45                            | 79.95                            | C96     | 64.35                            | 80.95                            |
| G29    | 63.15                            | 81.15                            | P32    | 65.75                            | 79.55                            | C97     | 66.65                            | 80.85                            |
| G30    | 63.05                            | 76.75                            | P33    | 67.85                            | 80.05                            | C98     | 68.05                            | 83.05                            |
| G31    | 63.25                            | 78.65                            | P34    | 62.75                            | 77.85                            | C99     | 64.35                            | 78.55                            |
| G32    | 60.65                            | 78.15                            | P35    | 65.45                            | 78.95                            | C100    | 66.75                            | 80.45                            |
| G33    | 65.35                            | 80.75                            | P36    | 63.25                            | 78.25                            | C101    | 66.55                            | 78.95                            |
| G34    | 52.45                            | 74.25                            | P37    | 62.45                            | 77.15                            | C102    | 63.55                            | 79.75                            |
| G35    | 66.25                            | 78.75                            | P38    | 61.65                            | 78.95                            | C103    | 67.15                            | 79.55                            |
| G36    | 66.25                            | 81.55                            | P39    | 64.45                            | 78.85                            | C104    | 66.15                            | 79.35                            |
| G37    | 65.95                            | 79.75                            | P40    | 62.95                            | 77.45                            | C105    | 64.85                            | 78.15                            |
| G38    | 63.35                            | 80.25                            | P41    | 68.25                            | 80.95                            | C106    | 64.95                            | 79.75                            |
| G39    | 64.05                            | 79.85                            | P42    | 62.05                            | 78.55                            | C107    | 64.75                            | 79.95                            |
| G40    | 56.85                            | 77.25                            | P43    | 55.15                            | 77.05                            | C108    | 65.35                            | 79.45                            |
| G41    | 66.65                            | 80.05                            | P44    | 64.05                            | 79.65                            | C109    | 62.95                            | 80.45                            |
| G42    | 66.05                            | 81.25                            | P45    | 65.05                            | 79.15                            | C110    | 64.55                            | 78.65                            |
| G43    | 64.55                            | 78.15                            | P46    | 65.15                            | 78.95                            | C111    | 64.95                            | 79.05                            |
| G44    | 64.05                            | 78.15                            | P47    | 65.15                            | 78.65                            | C112    | 65.65                            | 80.05                            |
| G45    | 64.45                            | 79.55                            | P48    | 63.05                            | 76.65                            | C113    | 65.05                            | 79.85                            |
| G46    | 66.65                            | 80.05                            | P49    | 61.95                            | 76.95                            | C114    | 65.75                            | 80.85                            |
| G47    | 64.85                            | 80.55                            | P50    | 65.85                            | 79.85                            | C115    | 65.25                            | 78.45                            |
| G48    | 63.85                            | 79.15                            | P51    | 62.05                            | 76.75                            | C116    | 62.15                            | 78.35                            |
| G49    | 64.85                            | 80.55                            | P52    | 67.05                            | 80.05                            | C117    | 64.35                            | 81.05                            |
| G50    | 66.25                            | 79.75                            | P53    | 65.55                            | 79.55                            | C118    | 66.65                            | 79.55                            |
| G51    | 65.05                            | 80.55                            | P54    | 62.25                            | 79.65                            | C119    | 65.35                            | 80.15                            |
| G52    | 63.85                            | 79.65                            | P55    | 61.25                            | 79.35                            | C120    | 61.85                            | 77.95                            |
| G53    | 63.05                            | 78.15                            | P56    | 61.55                            | 76.85                            | C121    | 65.45                            | 79.85                            |
| G54    | 65.55                            | 79.65                            | P57    | 63.95                            | 77.25                            | C122    | 66.15                            | 78.65                            |
| G55    | 64.35                            | 79.65                            | P58    | 65.55                            | 78.05                            | C123    | 63.75                            | 78.95                            |
| G56    | 65.75                            | 81.25                            |        |                                  |                                  | C124    | 65.75                            | 79.05                            |
| G57    | 65.75                            | 79.65                            |        |                                  |                                  | C125    | 66.45                            | 79.15                            |
| G58    | 63.55                            | 79.75                            |        |                                  |                                  | C126    | 64.05                            | 77.35                            |
| G59    | 65.95                            | 79.95                            |        |                                  |                                  | C127    | 64.55                            | 78.75                            |
| G60    | 65.45                            | 79.95                            |        |                                  |                                  | C128    | 64.65                            | 79.35                            |
| G61    | 63.55                            | 81.35                            |        |                                  |                                  | C129    | 63.15                            | 77.45                            |
| G62    | 64.15                            | 79.75                            |        |                                  |                                  | C130    | 63.05                            | 78.35                            |
| G63    | 65.65                            | 79.85                            |        |                                  |                                  | C131    | 66.25                            | 79.25                            |
| G64    | 64.25                            | 79.15                            |        |                                  |                                  | C132    | 66.95                            | 79.55                            |
| G65    | 63.95                            | 79.35                            |        |                                  |                                  | C133    | 62.35                            | 79.35                            |
| G66    | 66.35                            | 80.05                            |        |                                  |                                  | C134    | 62.45                            | 78.75                            |
| G67    | 65.65                            | 79.95                            |        |                                  |                                  | C135    | 66.95                            | 80.45                            |
| G68    | 66.65                            | 79.65                            |        |                                  |                                  | C136    | 65.35                            | 79.25                            |
| G69    | 65.25                            | 79.65                            |        |                                  |                                  | C137    | 65.95                            | 78.95                            |
| G70    | 65.75                            | 80.35                            |        |                                  |                                  | C138    | 64.65                            | 78.55                            |

|     |       |       |  |  |  |      |       |       |
|-----|-------|-------|--|--|--|------|-------|-------|
| G71 | 65.75 | 79.85 |  |  |  | C139 | 65.55 | 79.35 |
| G72 | 63.85 | 78.35 |  |  |  | C140 | 65.55 | 79.85 |
| G73 | 63.15 | 79.75 |  |  |  | C141 | 65.25 | 79.25 |
| G74 | 64.35 | 80.15 |  |  |  | C142 | 63.55 | 78.65 |
| G75 | 66.65 | 80.85 |  |  |  | C143 | 62.55 | 80.25 |
| G76 | 65.05 | 80.15 |  |  |  | C144 | 65.45 | 80.35 |
| G77 | 64.15 | 79.75 |  |  |  | C145 | 62.85 | 80.75 |
| G78 | 65.1  | 81.7  |  |  |  | C146 | 66.55 | 79.65 |
| G79 | 64.35 | 79.45 |  |  |  | C147 | 64.45 | 77.45 |
| G80 | 64.15 | 77.85 |  |  |  | C148 | 66.95 | 79.25 |
| G81 | 64.85 | 77.65 |  |  |  | C149 | 63.65 | 78.55 |
| G82 | 65.25 | 78.55 |  |  |  | C150 | 64.65 | 78.65 |
|     |       |       |  |  |  | C151 | 63.55 | 81.75 |
|     |       |       |  |  |  | C152 | 65.65 | 78.25 |
|     |       |       |  |  |  | C153 | 64.65 | 79.55 |
|     |       |       |  |  |  | C154 | 64.65 | 79.35 |
|     |       |       |  |  |  | C155 | 64.25 | 78.35 |
|     |       |       |  |  |  | C156 | 68.35 | 80.35 |
|     |       |       |  |  |  | C157 | 64.35 | 78.95 |
|     |       |       |  |  |  | C158 | 64.05 | 78.75 |
|     |       |       |  |  |  | C159 | 64.85 | 79.95 |
|     |       |       |  |  |  | C160 | 63.95 | 78.15 |
|     |       |       |  |  |  | C161 | 62.15 | 78.65 |
|     |       |       |  |  |  | C162 | 63.45 | 78.35 |
|     |       |       |  |  |  | C163 | 66.35 | 79.75 |
|     |       |       |  |  |  | C164 | 66.55 | 79.65 |
|     |       |       |  |  |  | C165 | 64.65 | 78.95 |
|     |       |       |  |  |  | C166 | 64.05 | 78.15 |
|     |       |       |  |  |  | C167 | 65.95 | 78.85 |
|     |       |       |  |  |  | C168 | 64.45 | 77.95 |
|     |       |       |  |  |  | C169 | 64.65 | 78.05 |
|     |       |       |  |  |  | C170 | 64.85 | 77.95 |
|     |       |       |  |  |  | C171 | 64.25 | 78.85 |
